# Supplementary material for: Multiple aspects of male germ cell development and interactions with Sertoli cells require inositol hexakisphosphate kinase-1
Source: PubMed Central journal article supplement (PMC5935691; doi:10.1038/s41598-018-25468-8), 2018-05-04
Supplement: 41598_2018_25468_MOESM1_ESM.pdf [file 41598_2018_25468_MOESM1_ESM.pdf]

**Title:** Multiple aspects of male germ cell development and interactions with Sertoli cells require inositol hexakisphosphate kinase-1

**Authors:** Chenglai Fu<sup>1,2\*</sup>, Tomas Rojas<sup>2</sup>, Alfred C. Chin<sup>2</sup>, Weiwei Cheng<sup>3</sup>, Isaac A. Bernstein<sup>2</sup>, Lauren K. Albacarys<sup>2</sup>, William W. Wright<sup>4</sup> and Solomon H. Snyder<sup>2,5,6\*</sup>

**Affiliations:**

<sup>1</sup>Department of Physiology and Pathophysiology, Tianjin Medical University, Tianjin 300070, China.

<sup>2</sup>The Solomon H. Snyder Department of Neuroscience, Johns Hopkins University School of Medicine, Baltimore, MD 21205, USA

<sup>3</sup>Division of Neuropathology, Department of Pathology, Johns Hopkins University School of Medicine, Baltimore, MD 21205, USA

<sup>4</sup>Department of Biochemistry and Molecular Biology, Johns Hopkins Bloomberg School of Public Health, Baltimore, MD 21205, USA

<sup>5</sup>Department of Pharmacology and Molecular Sciences, Johns Hopkins University School of Medicine, Baltimore, MD 21205, USA

<sup>6</sup>Department of Psychiatry and Behavioral Sciences, Johns Hopkins University School of Medicine, Baltimore, MD 21205, USA

\*Corresponding author. Email: cfu9@jhmi.edu or ssnyder@jhmi.edu

S1

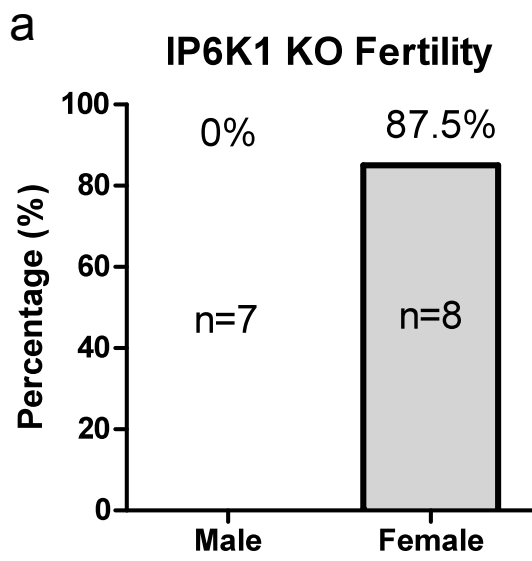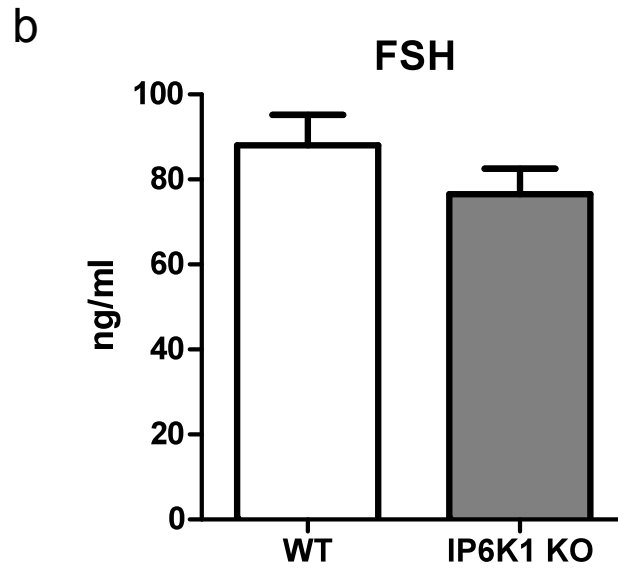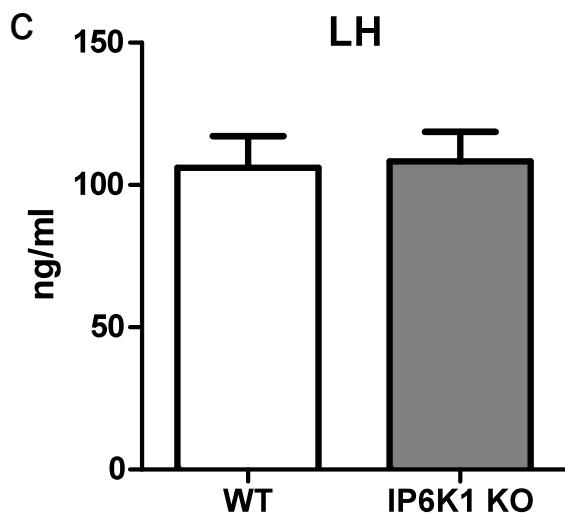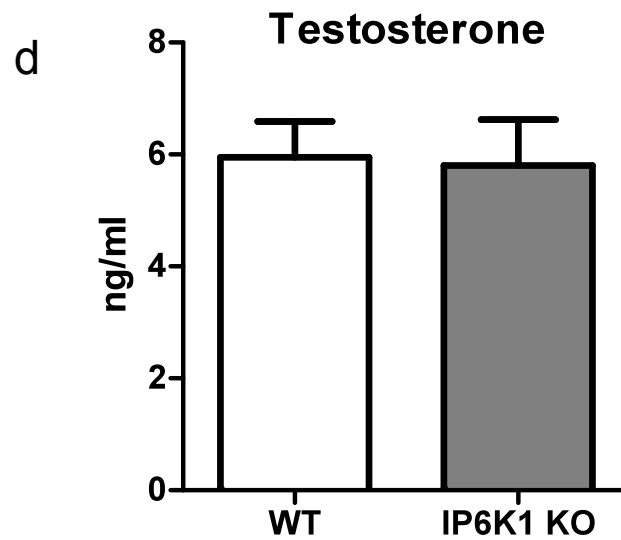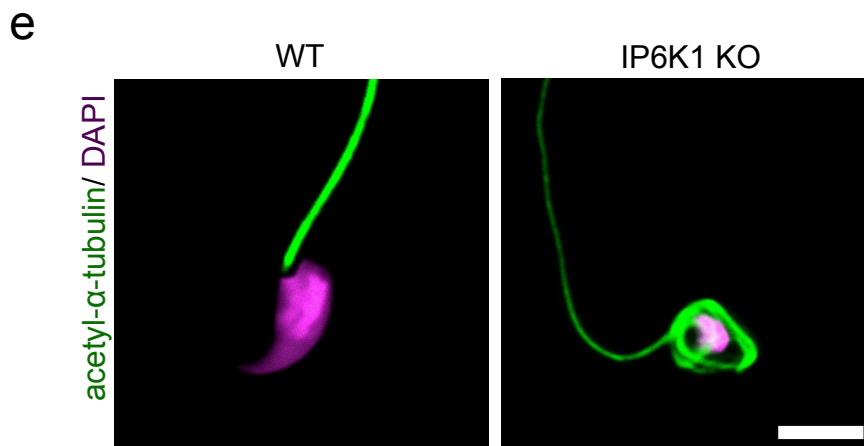

Fig. S1 *IP6K1* KO male mice were infertile. (a) *IP6K1* KO male mice (n=7) mated with wild type female mice, none of the females were pregnant; *IP6K1* KO female mice (n=8) mated with wild type male mice, Seven of 8 *IP6K1* KO females were pregnant and produced progeny. (b) Normal blood FSH levels in *IP6K1* KO male mice, determined by ELISA. (n=6, male 10 weeks old, unpaired student's t-test, mean  $\pm$  s.e.m.). (c) Normal blood LH levels in *IP6K1* KO male mice, determined by ELISA. (n=6, male 10 weeks old, unpaired student's t-test, mean  $\pm$  s.e.m.). (d) Normal blood testosterone levels in *IP6K1* KO male mice, determined by ELISA. (n=6, male 10 weeks old, unpaired student's t-test, mean  $\pm$  s.e.m.). (e) Sperm cells were isolated from epididymides. Immunostaining of acetyl- $\alpha$ -tubulin for sperm tails; and nucleus was stained by DAPI. Abnormal sperm heads coiled by sperm tails were seen in the *IP6K1* KOs. Scale bar 5  $\mu$ m.

S2

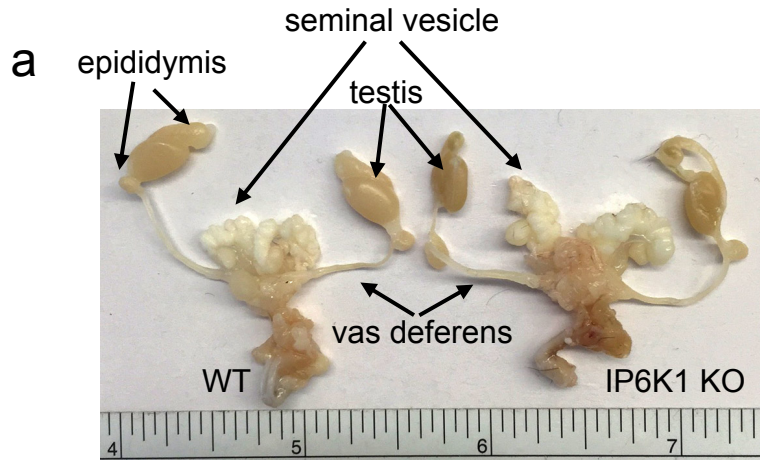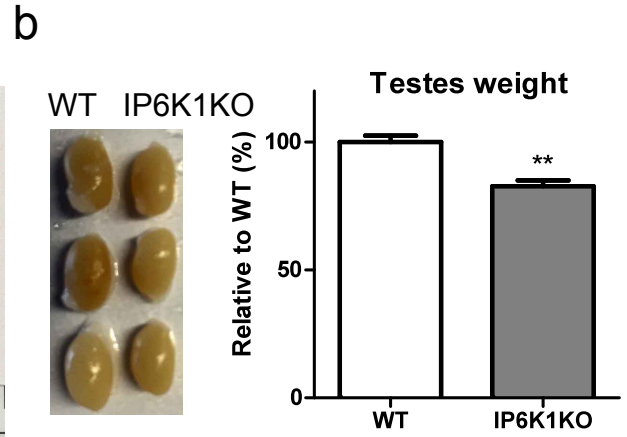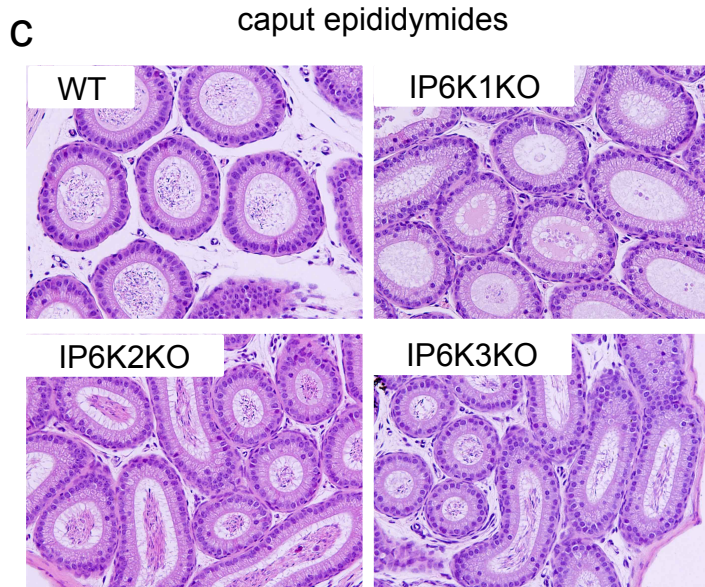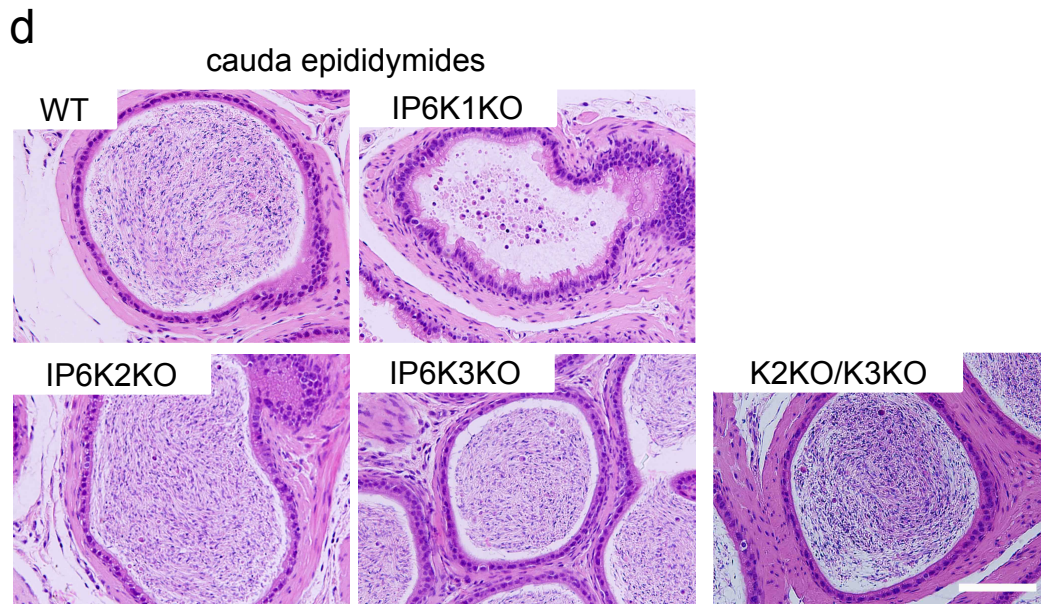

Fig. S2 *IP6K1* KO testes were smaller and devoid of sperm in epididymides. (a) Image shows the reproductive organs of *IP6K1* WT and KO male mice; The *IP6K1* KO male mice have intact reproductive organs but smaller testes. (b) Testes of *IP6K1* KO mice were smaller than those of wild type (n=6). \*\*P<0.01 by unpaired student's t-test. (c) H&E staining of caput epididymides of wild type, *IP6K1* KO, *IP6K2* KO, *IP6K3* KO and *IP6K2/IP6K3* double knockout mice. *IP6K1* KO caput epididymides were devoid of sperms. Scale bar 100  $\mu$ m. (d) H&E staining of cauda epididymides of wild type, *IP6K1* KO, *IP6K2* KO, *IP6K3* KO and *IP6K2/IP6K3* double knockout mice. Round germ cells were seen in *IP6K1* KO cauda epididymides. Scale bar 100  $\mu$ m.

S3

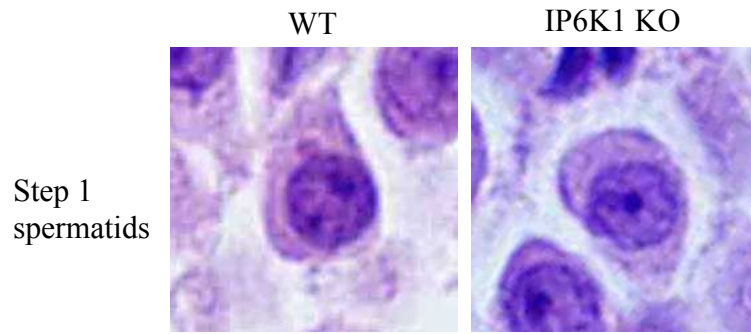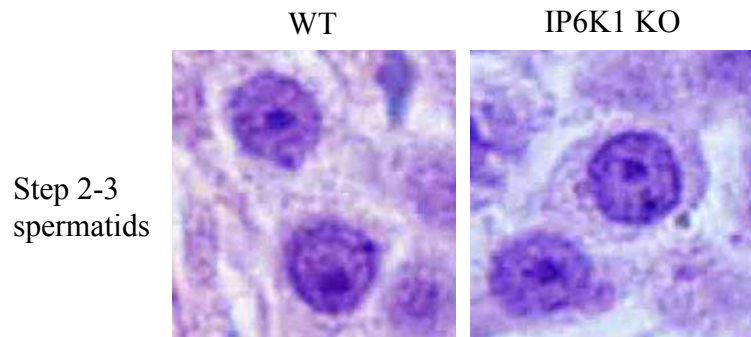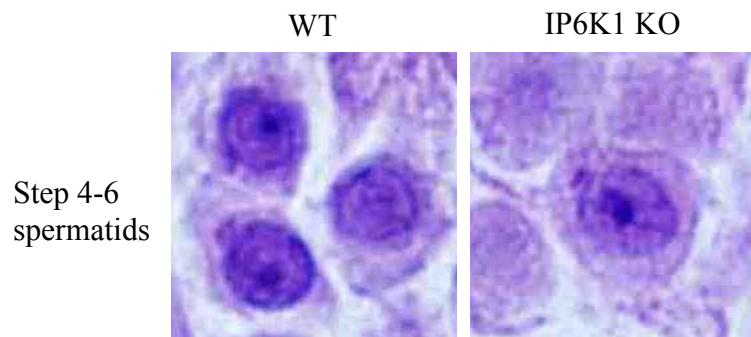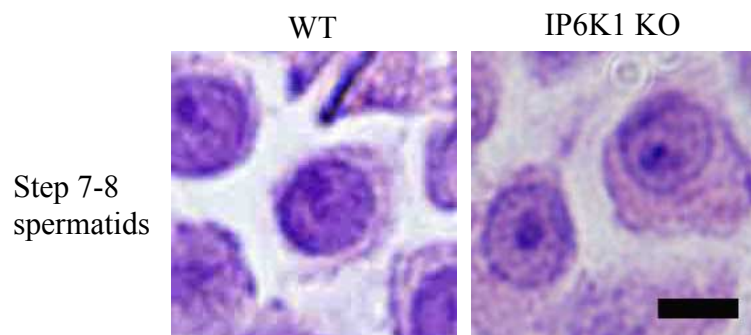

Fig. S3 H&E staining of WT and *IP6K1* KO testes revealed morphologically normal round spermatids (steps 1-8) in *IP6K1* KOs. Scale bar 5  $\mu$ m.

S4

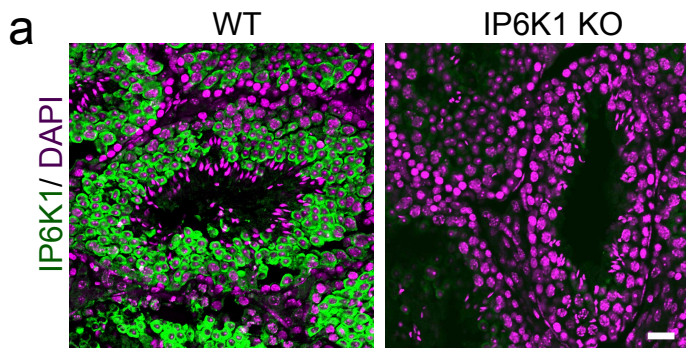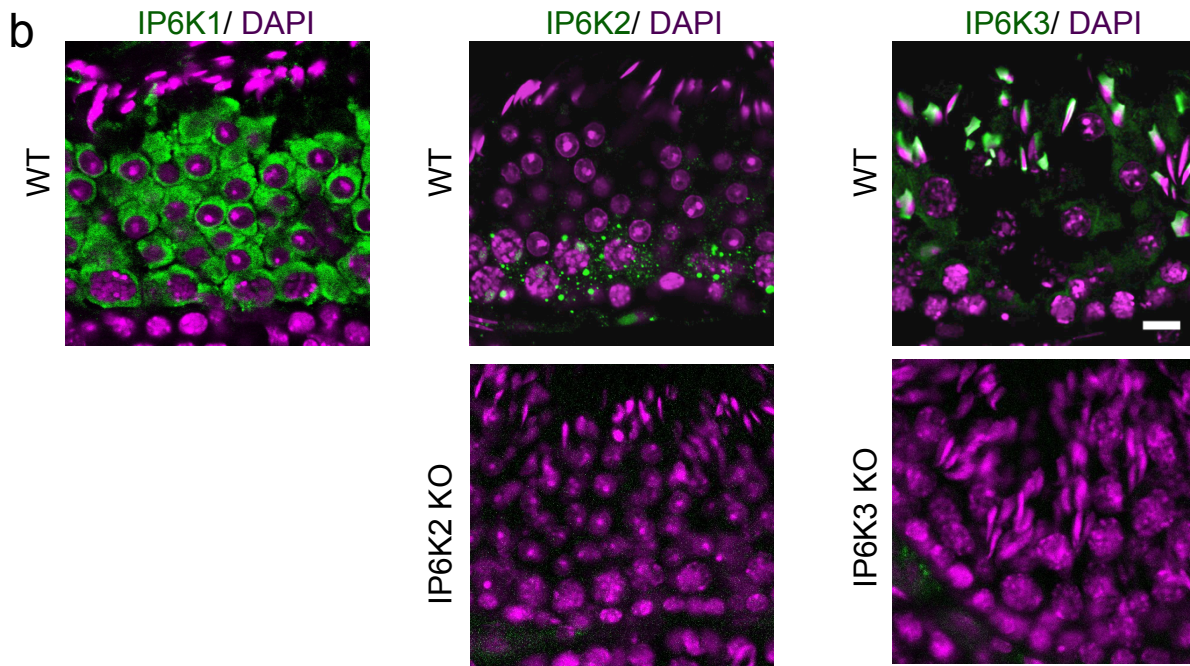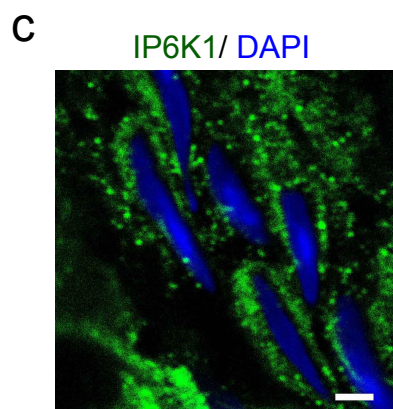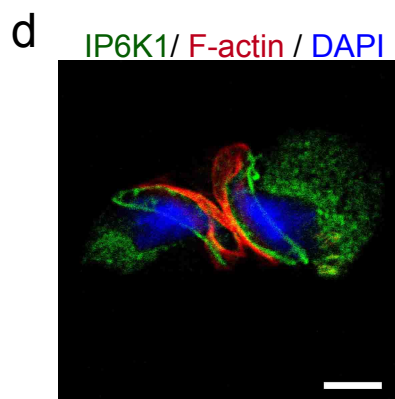



Fig. S4 IP6K1 was expressed in germ cells. (a) Immunostaining of IP6K1 in wild type and *IP6K1* KO testes, scale bar 20  $\mu\text{m}$ . (b) Immunostaining of IP6K1 in wild type testes; Immunostaining of IP6K2 in wild type and *IP6K2* KO testes; Immunostaining of IP6K3 in wild type and *IP6K3* KO testes; scale bar 10  $\mu\text{m}$ . (c) Immunostaining of IP6K1 in wild type testes, scale bar 2  $\mu\text{m}$ . (d) Immunostaining of IP6K1 on loose spermatids released from the minced testes, scale bar 5  $\mu\text{m}$ .

S5

a

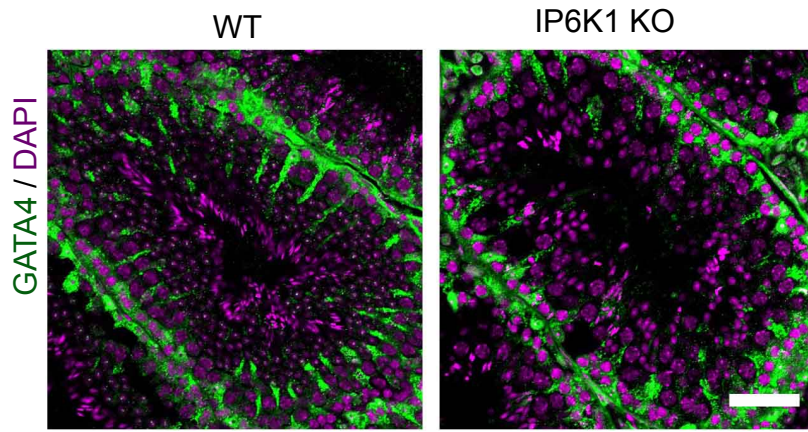

b

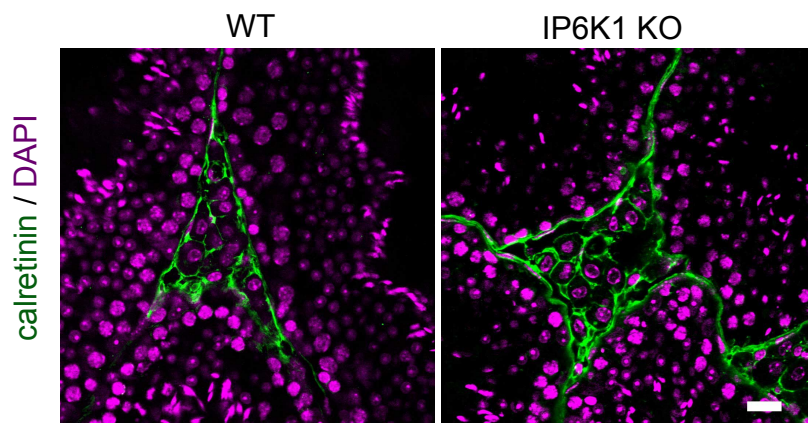

Fig. S5 Relative normal numbers of Sertoli cells and Leydig cells in *IP6K1* KOs. (a) Immunostaining of GATA4 for Sertoli cells in WT and *IP6K1* KO testes. DAPI stains nucleus. Scale bar 50  $\mu\text{m}$ . (b) Immunostaining of calretinin for Leydig cells in WT and *IP6K1* KO testes. DAPI stains nucleus. Scale bar 20  $\mu\text{m}$ .
